# Supplementary material for: CRISPR/Cas12a coupled with loop-mediated isothermal amplification and lateral flow assay for SARS-CoV-2 detection
Source: Royal Society of Chemistry journal article supplement (doi:10.1039/d4ay00757c), 2024-01-01
Supplement: d4ay00757c1.pdf [file d4ay00757c1.pdf]

## CRISPR/Cas12a coupled with Loop-mediated isothermal amplification and for SARS-CoV-2 detection

Yuer Wang<sup>1#</sup>, Yadan Peng<sup>1#</sup>, Sitong Liu<sup>2#</sup>, Mengzhe Li<sup>1</sup>, Xiaojing Pei<sup>2\*</sup>, Yigang Tong<sup>1\*</sup>

<sup>1</sup> College of Life Science and Technology, Beijing University of Chemical Technology, Beijing, 100029, China

<sup>2</sup> College of Chemistry and Materials Engineering and Institute of Cosmetic Regulatory Science, Beijing Technology and Business University, Beijing 100048, P. R. China

#These authors contributed equally to this work.

\*Correspondence: Xiaojing Pei: [pxj@btbu.edu.cn](mailto:pxj@btbu.edu.cn); Yigang Tong [tongyigang@mail.buct.cn](mailto:tongyigang@mail.buct.cn).

**Table S1.** Sequences of qPCR primers.

| GeneBank   | Name of primer | 5'-3'                       |
|------------|----------------|-----------------------------|
| AY184219.1 | PV1 F          | CCGTATTGAGCCAGTATGTTTGT     |
|            | PV1 R          | TAGCGAGTAGGTGGAGGTGTTC<br>T |
| MN817130.1 | ECHO F         | CGGCCCTGAATGCGGCTAA         |
|            | ECHO R         | GAAACACGGACACCCAAAGTA       |
| MK307505.1 | EV-A71 F       | GCAGCCCAAAGAACTTCAC         |
|            | EV-A71 R       | ATTCAGCAGCTTGGAGTGC         |
| JX312064.1 | CV-B3 F        | CGGTACCTTTGTGCGCCTGTT       |
|            | CV-B3 R        | GCGGTGCTCATCGACCTGA         |
| MW192795.1 | CV-A9 F        | TCATGACACCAGCTGATAAGG       |
|            | CV-A9 R        | TGCTCATCTGCTCTGAAGTATC      |
| NC_045512  | SARS-CoV-2 F   | GGGGAAGTTCTCCTGCTAGAAT      |
|            | SARS-CoV-2 R   | CAGACATTTTGCTCTCAAGCTG      |
| MT072864.1 | GX_P2V-F       | GGTGATTGCCTTGGTGATATTG      |
|            | GX_P2V-R       | GCAAGTAGTGCAGAAGTGTATT<br>G |

**Table S2.** RT-LAMP primers for GX\_P2V.

| Name of primer | 5'-3'              |
|----------------|--------------------|
| F3-P01         | CGGTGGTCATAGTTTCGG |
| B3-P01         | CTCAAGAGGGTAGCCGTC |

|         |                                                     |
|---------|-----------------------------------------------------|
| FIP-P01 | AGTTGACTTGAAAGTCATCAATGGGTTCGATCTAAAGTCTTATGACTTAGG |
| BIP-P01 | GGAACACTAAACATGGCAGTGGCTACATAGCGAGTGTATGCG          |
| LF-P01  | CAGTGCCAAGCTCGTCA                                   |
| LB-P01  | TGTAACCTCGTGAGCTCATGC                               |
| F3-P02  | TTCTTAAAAGAGGTGACAAAGT                              |
| B3-P02  | CAAACCTGTTGCCATAAGTCAT                              |
| FIP-P02 | AGTGTCTTAAGACTGTCAATGTTGATACCACACAACCTAGTAAACCAAT   |
| BIP-P02 | TAGCTCTTAGGGAAGTTAAGACCAGACATGTCCACAACCTTGAG        |
| LF-P02  | CACCATCCATGTGGAAAGTG                                |
| LB-P02  | TAAGGTGTTTACCACAGTTGAC                              |
| F3-P03  | GACAATTCTCCTAATATTGCTTG                             |
| B3-P03  | CCAAAACAAACCTACCTCC                                 |
| FIP-P03 | CGGGACTCAGTTCATTATTCTGAAGGCCTCTTATTGTAACAGCTTTA     |
| BIP-P03 | CGACAGATGTCATGTGCTGCACTTTGATGTGTTATAGTAGGCTAA       |
| LF-P03  | TGACAGCTGAATTGGCTCT                                 |
| LB-P03  | GGTACTACACAAACAGCTTGTAATG                           |

**Table S3.** RT-LAMP primers and amplicon for SARS-CoV-2.

| Name of primer  | 5'-3'                                                                                                                                                                                                                                                     |
|-----------------|-----------------------------------------------------------------------------------------------------------------------------------------------------------------------------------------------------------------------------------------------------------|
| F3-S12          | CCGACGACGACTACTAGC                                                                                                                                                                                                                                        |
| B3-S12          | AGAGTAAACGTAAAAAGAAGGT                                                                                                                                                                                                                                    |
| FIP-S12         | CTAGCCATCCTTACTGCGCTACTCACGTTAACAATATTGCA                                                                                                                                                                                                                 |
| BIP-S12         | ACCTGTCTCTTCCGAAACGAATTTGTAAGCACAAGCTGATG                                                                                                                                                                                                                 |
| LF-S12          | TCGATTGTGTGCGTACTGC                                                                                                                                                                                                                                       |
| LB-S12          | TGAGTACATAAGTTCGTAC                                                                                                                                                                                                                                       |
| S12<br>Amplicon | CCGACGACGACTACTAGCGTGCCTTTGTAAGCACAAGCTGATGAGTACG<br>AACTTATGTACTCATTTCGTTTCGGAAGAGACAGGTACGTTAATAGTTAAT<br>AGCGTACTTCTTTTTCTTGCTTTCGTGGTATTCTTGCTAGTTACACTAGCC<br>ATCCTTACTGCGCTTCGATTGTGTGCGTACTGCTGCAATATTGTTAACGT<br>GAGTCTTGTAACCTTCTTTTTACGTTTACTCT |
| F3-S13          | AGCTGATGAGTACGAACTT                                                                                                                                                                                                                                       |
| B3-S13          | TTCAGATTTTAAACACGAGAGT                                                                                                                                                                                                                                    |
| FIP-S13         | ACCACGAAAGCAAGAAAAAGAAGTATTCGTTTCGGAAGAGACAG                                                                                                                                                                                                              |
| BIP-S13         | TTGCTAGTTACACTAGCCATCCTTAGGTTTTACAAGACTCACGT                                                                                                                                                                                                              |
| LF-S13          | n/a                                                                                                                                                                                                                                                       |
| LB-S13          | CTGCGCTTCGATTGTGTGCGT                                                                                                                                                                                                                                     |
| S13<br>Amplicon | AGCTGATGAGTACGAACTTATGTACTCATTTCGTTTCGGAAGAGACAGGT<br>ACGTTAATAGTTAATAGCGTACTTCTTTTTCTTGCTTTCGTGGTATTCTTG<br>CTAGTTACACTAGCCATCCTTACTGCGCTTCGATTGTGTGCGTACTGCTG<br>CAATATTGTTAACGTGAGTCTTGTAACCTTCTTTTTACGTTTACTCTCG<br>TGTTAAAAATCTGAA                   |
| F3-S14          | TGAGTACGAACTTATGTACTCAT                                                                                                                                                                                                                                   |
| B3-S14          | TTCAGATTTTAAACACGAGAGT                                                                                                                                                                                                                                    |

FIP-S14 ACCACGAAAGCAAGAAAAAGAAGTTCGTTTCGGAAGAGACAG  
BIP-S14 TTGCTAGTTACTAGCCATCCTTAGGTTTTACAAGACTCACGT  
LF-S14 GCGCTTCGATTGTGTGCGT  
LB-S14 CGCTATTA ACTATTAACG  
S14 TGAGTACGAACTTATGTACTCATTTCGTTTCGGAAGAGACAGGTACGTAA  
Amplicon TAGTTAATAGCGTACTTCTTTTTCTTGCTTCGTGGTATTCTTGCTAGTTA  
CACTAGCCATCCTTACTGCGCTTCGATTGTGTGCGTACTGCTGCAATATT  
GTTAACGTGAGTCTTGTA AACCTTCTTTTTACGTTTACTCTCGTGTTAAA  
AATCTGAAT

---

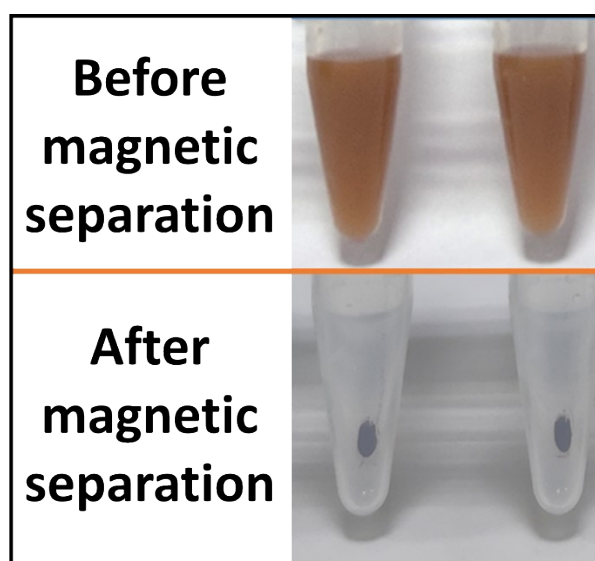

Fig. S1 Schematic diagram before and after magnetic separation.

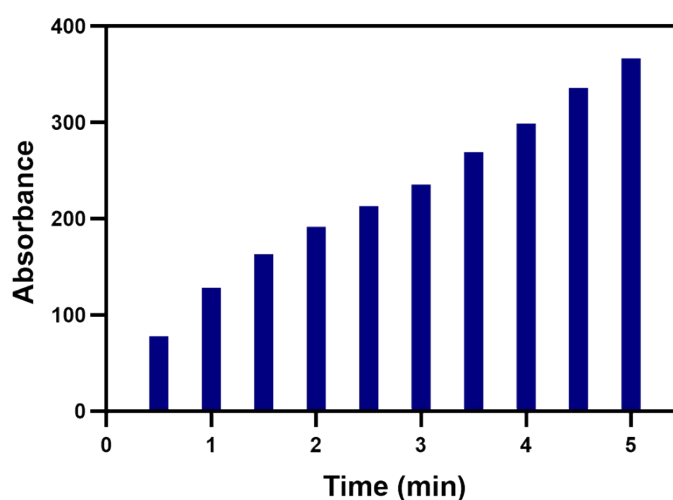

Fig. S2 Absorbance of LFA at different times.

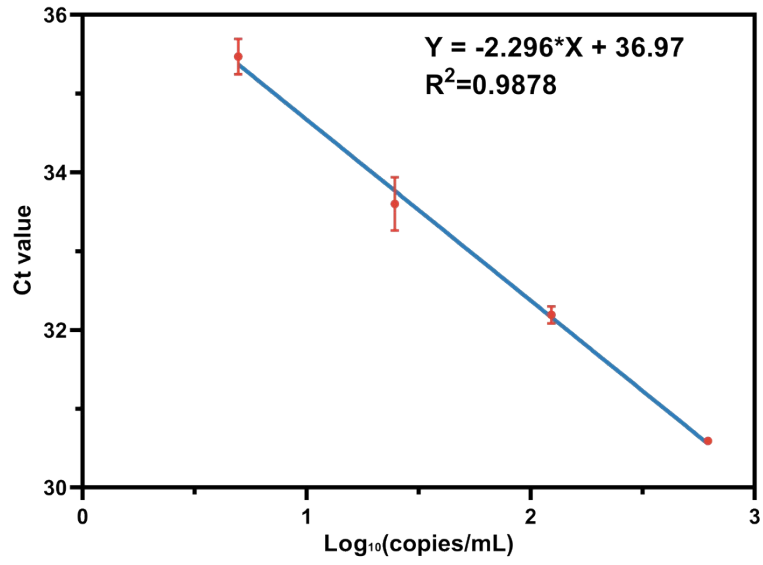

**Fig. S3** The calibration curve with the Ct values and the respective copy numbers per milliliter of the SARS-CoV-2 pseudovirus sample.

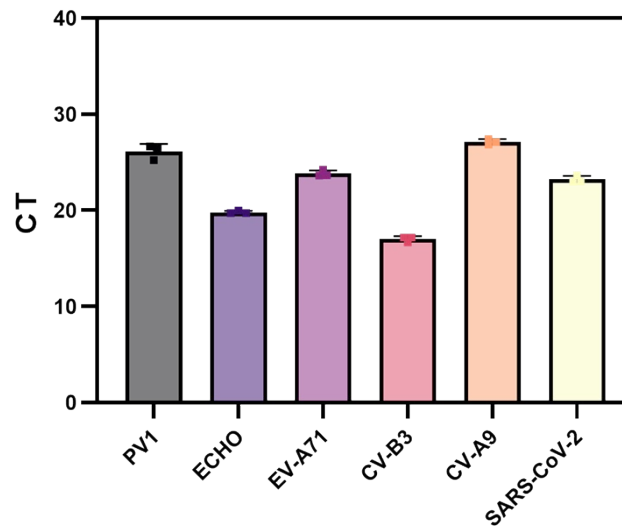

**Fig. S4** The qPCR of cDNA from SARS-CoV-2 and five RNA viruses.

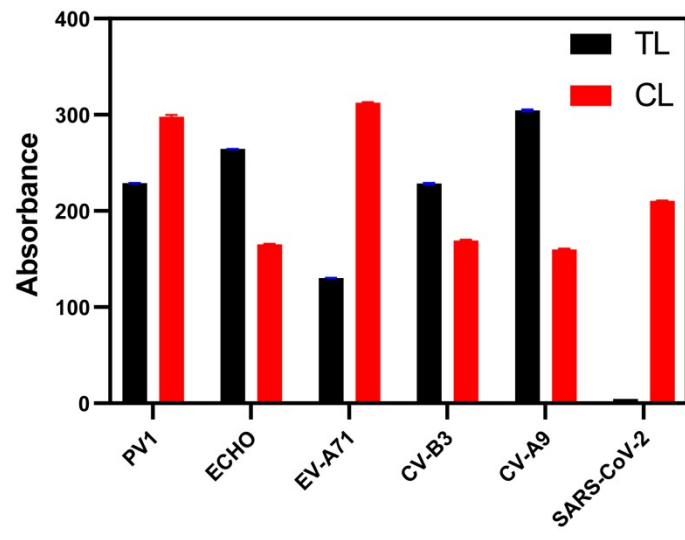

**Fig. S5** Absorbance of TL and CL for LFA of different virus samples.
